# Supplementary material for: Polymeric immunoglobulin receptor promotes Th2 immune response in the liver by increasing cholangiocytes derived IL-33: a diagnostic and therapeutic biomarker of biliary atresia
Source: PubMed Central journal article supplement — eBioMedicine. 2024 Sep 16;108:105344. doi: 10.1016/j.ebiom.2024.105344 (PMC11421278; doi:10.1016/j.ebiom.2024.105344), 2024-09-16

## 1. Blots in Figure 3E:

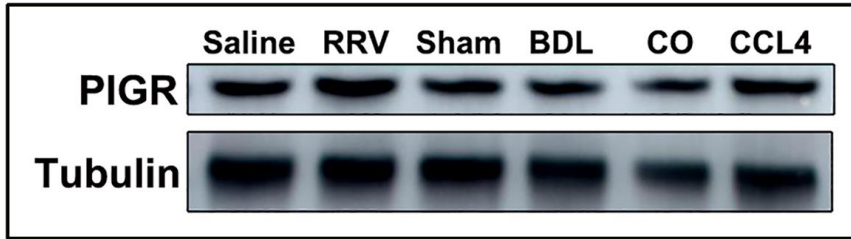

### (1). Full blots of PIGR:

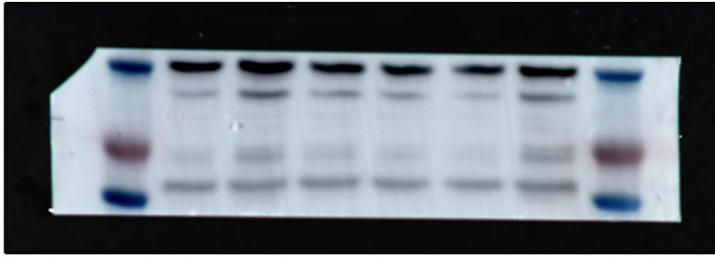

### (2). Full blots of Tubulin

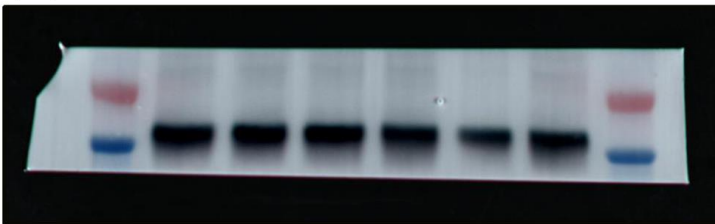

## 2. Blots in Figure 3F

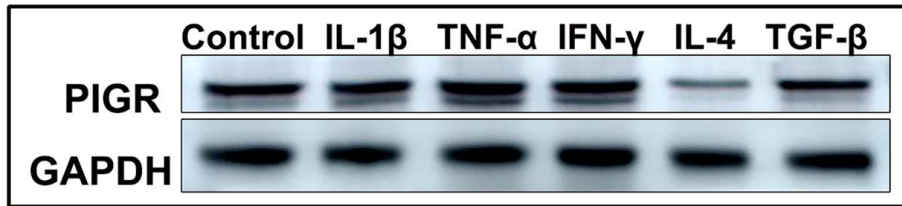

### (2.1) Full blots of PIGR in Figure 3F

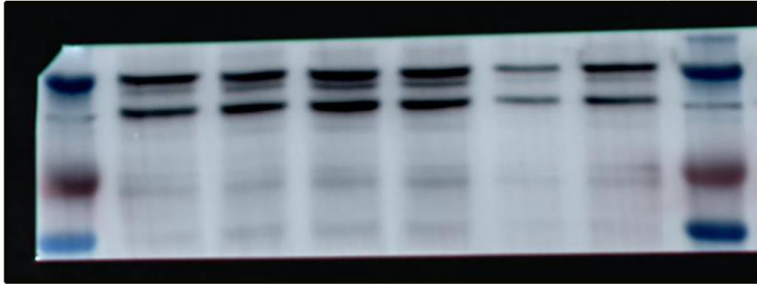

### (2.2) Full blots of GAPDH in Figure 3F

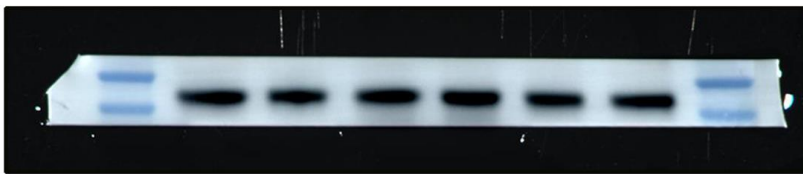

### 3. Blots in Figure 3G

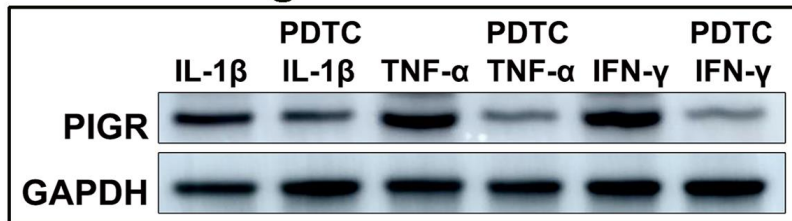

#### (3.1) Full blots of PIGR in Figure 3G

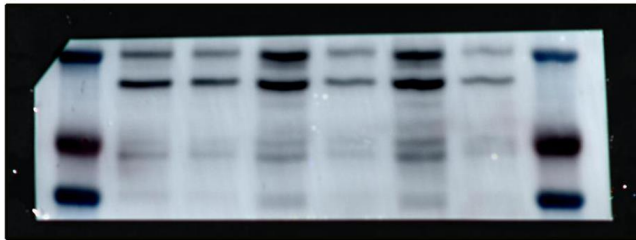

#### (3.2) Full blots of GAPDH in Figure 3G

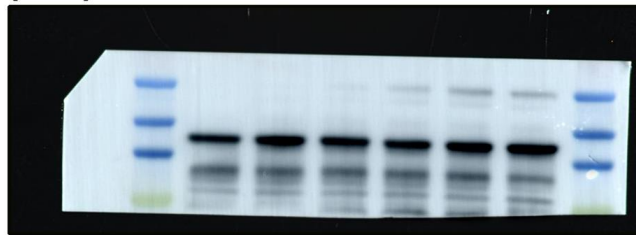

#### 4. Blots in Figure 4B

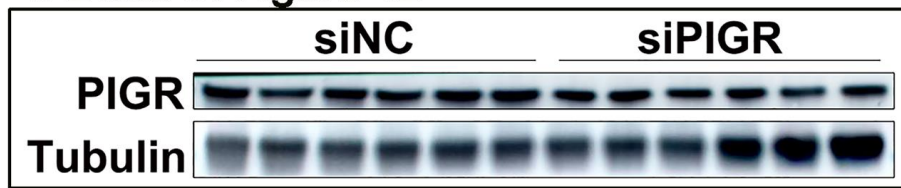

#### (4.1) Full blots of PIGR in Figure 4B

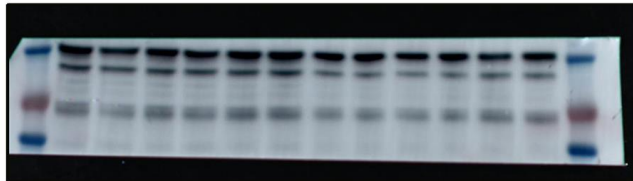

#### (4.2) Full blots of Tubulin in Figure 4B

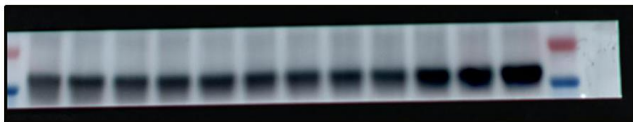

## 5. Blots in Figure 5B

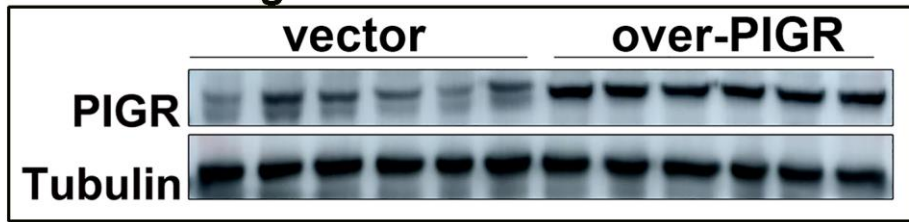

### (5.1) Full blots of PIGR in Figure 5B

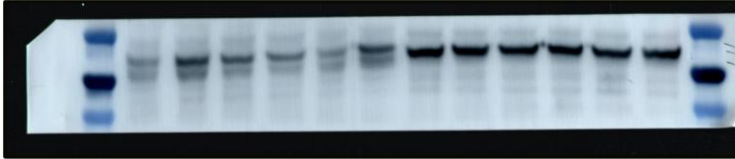

### (5.2) Full blots of Tubulin in Figure 5B

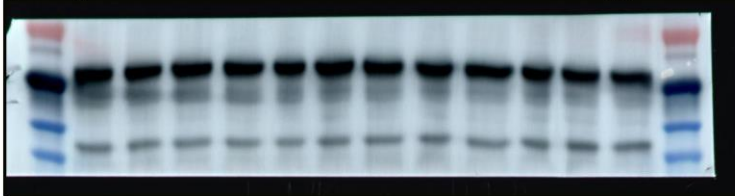

### 6.1 Blots-1 in Figure 7A

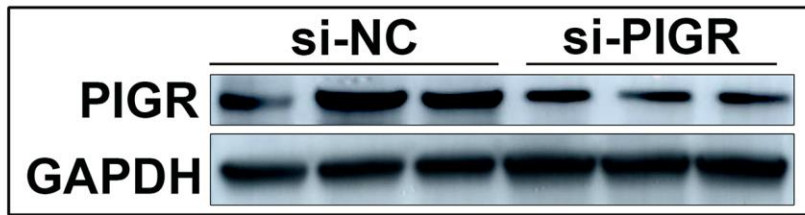

#### (6.1.1) Full blots of PIGR in 6.1

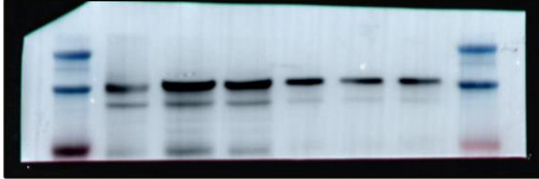

#### (6.1.2) Full blots of GAPDH in 6.1

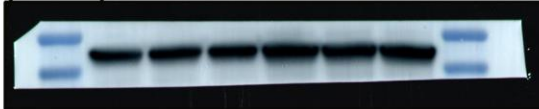

### 6.2 Blots-2 in Figure 7A

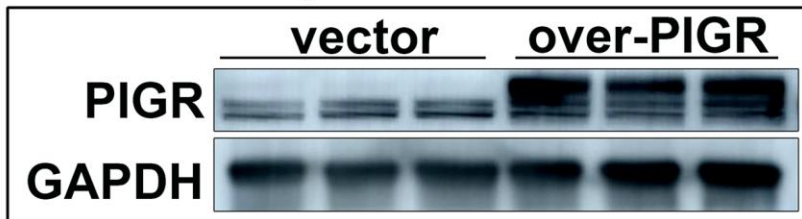

#### (6.2.1) Full blots of PIGR in 6.2

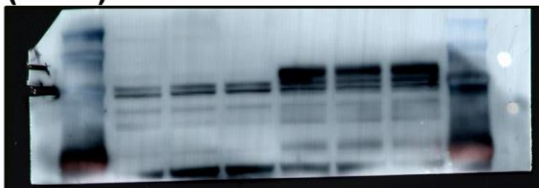

#### (6.2.2) Full blots of GAPDH in 6.2

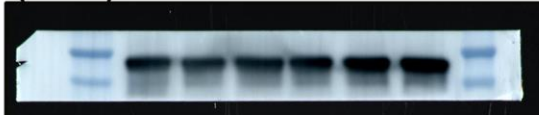

### 7.1 Blots-1 in Figure 7D

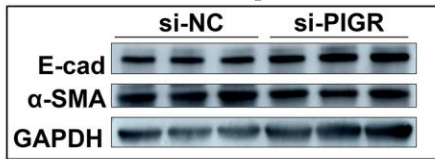

(7.1.1) Full blots of E-cad in 7.1

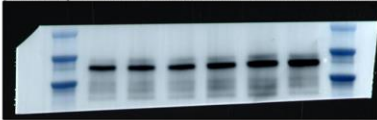

(7.1.2) Full blots of  $\alpha$ -SMA in 7.1

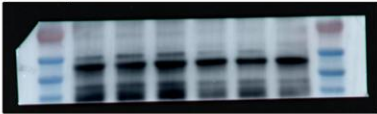

(7.1.3) Full blots of GAPDH in 7.1

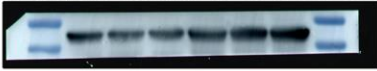

### 7.2 Blots-2 in Figure 7D

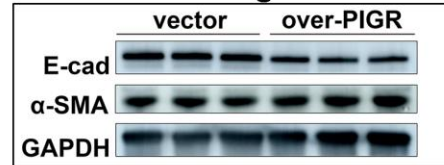

(7.2.1) Full blots of E-cad in 7.2

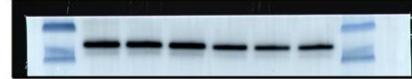

(7.2.2) Full blots of  $\alpha$ -SMA in 7.2

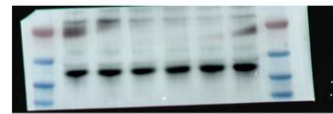

(7.2.3) Full blots of GAPDH in 7.2

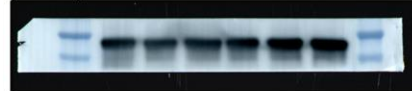

Supplement: mmc4.pdf [file mmc4.pdf]
