# Supplementary material for: Polymeric immunoglobulin receptor promotes Th2 immune response in the liver by increasing cholangiocytes derived IL-33: a diagnostic and therapeutic biomarker of biliary atresia
Source: PubMed Central journal article supplement — eBioMedicine. 2024 Sep 16;108:105344. doi: 10.1016/j.ebiom.2024.105344 (PMC11421278; doi:10.1016/j.ebiom.2024.105344), 2024-09-16
Supplement: mmc2.pdf [file mmc2.pdf]

# Supplementary Figure S1

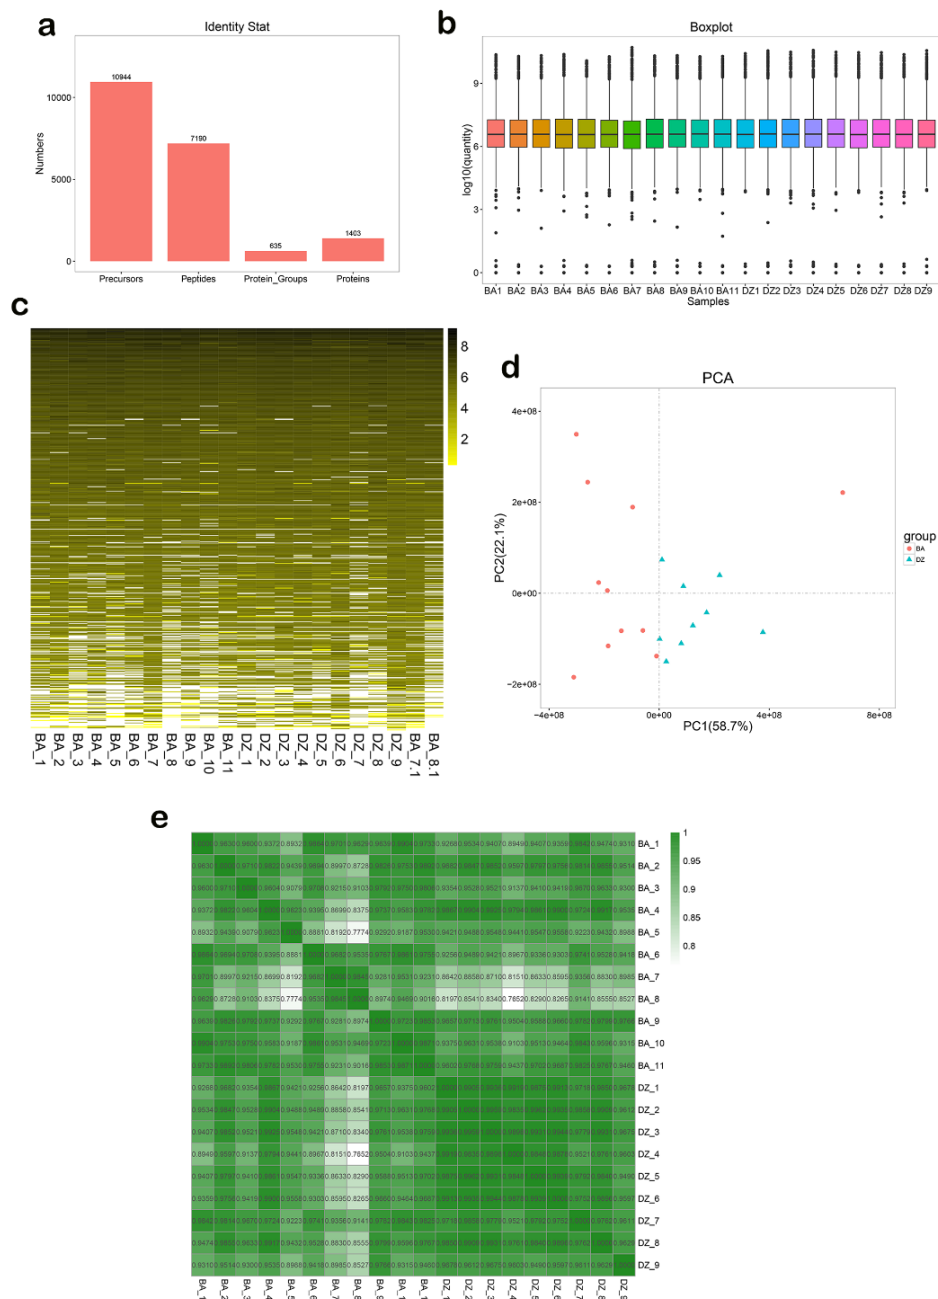

**Figure S1.** (a) Identification of serum protein via proteomics analysis. (b) Box diagram showing the peak-intensity distributions of mass spectrum signals for all samples. (c) A quantification heatmap for all serum proteins found by proteomics analysis. (d) PCA analysis of all serum proteins in 20 samples detected via proteomics analysis. (e) Correlation heatmap for the serum samples subjected to proteomics analysis.

## Supplementary Figure S2

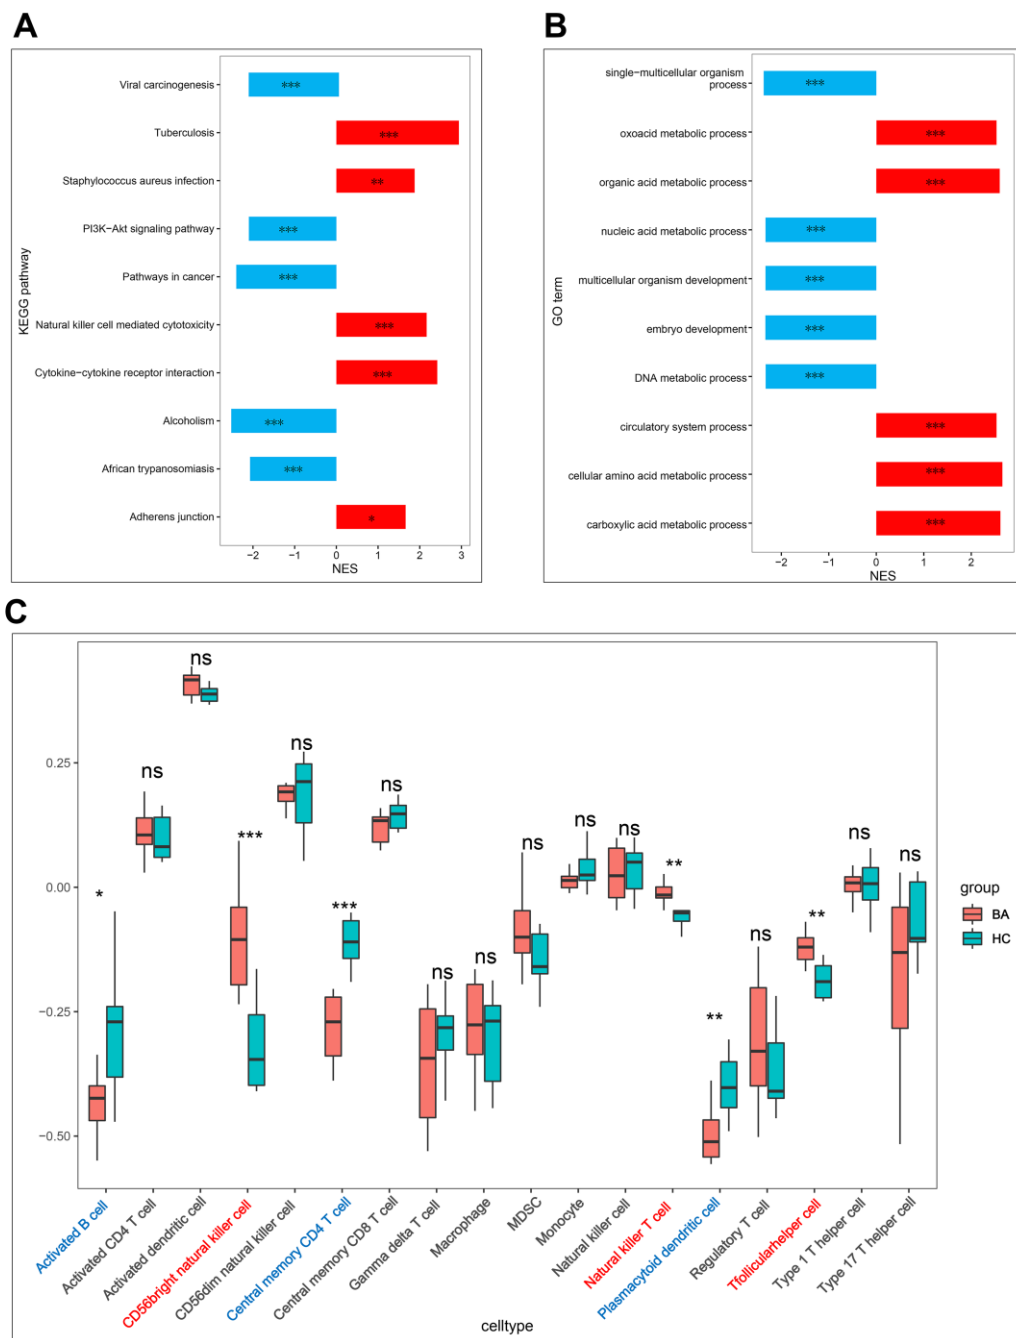

**Figure S2.** (A) The top 5 KEGG pathways upregulated in BA (red) and the top five KEGG pathways downregulated in BA (blue). \* $P < 0.05$ ; \*\* $P < 0.01$ ; \*\*\* $P < 0.001$ ; two-tailed T test. (B) The top 5 GO terms upregulated in BA (red) and the top five GO terms downregulated in BA (blue). \*\*\* $P < 0.001$ , two-tailed T test. (C) Immune cell-infiltration analysis. ns,  $P > 0.05$ ; \* $P < 0.05$ ; \*\* $P < 0.01$ ; \*\*\* $P < 0.001$ ; two-tailed T test. Immune cell types that showed significantly increased infiltration in BA are marked in red, immune cells that showed significantly decreased infiltration in BA are marked in blue.

### Supplementary Figure S3

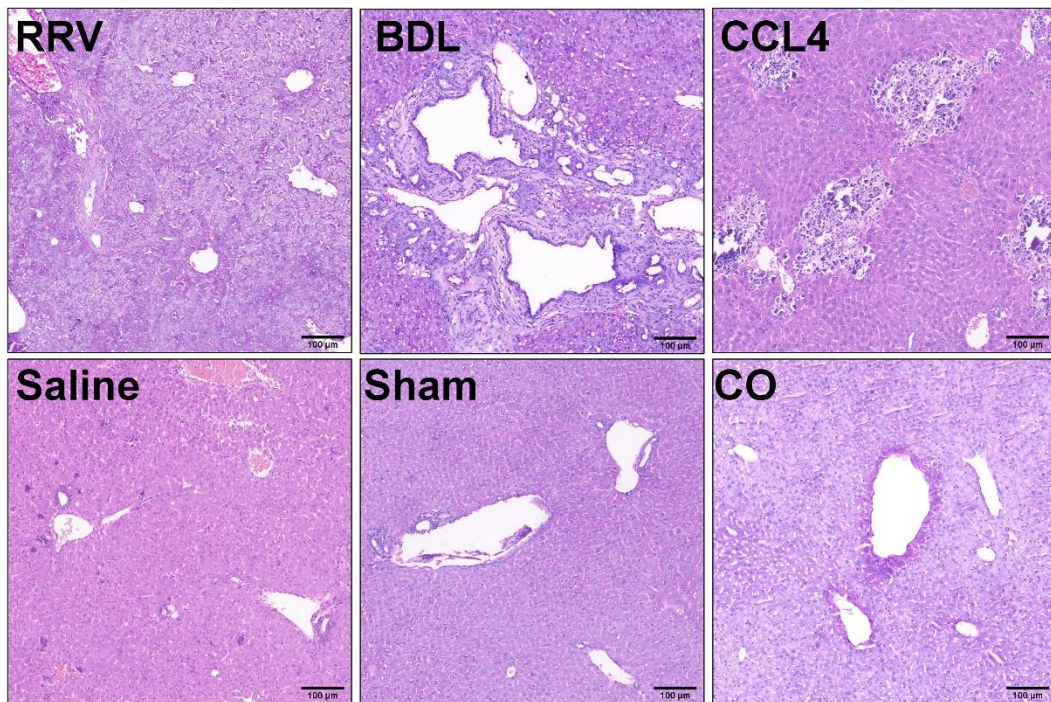

**Figure S3.** HE staining of liver sections from the experimental mouse models (Original magnification,  $\times 100$ ; Scale bars, 100 $\mu\text{m}$ ).

## Supplementary Figure S4

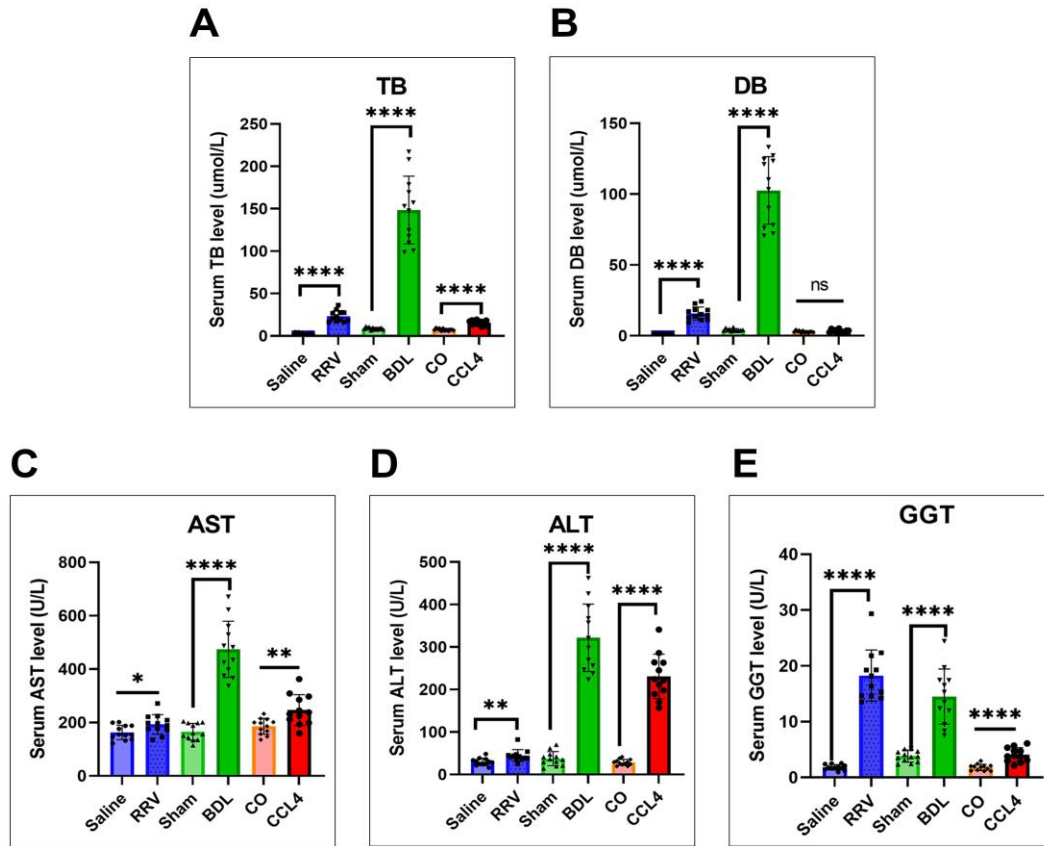

**Figure S4.** (A) Serum levels of total bilirubin in the experimental mouse models. (B) Serum levels of direct bilirubin in the experimental mouse models. (C) Serum levels of AST in the experimental mouse models. (D) Serum levels of ALT in the experimental mouse models. (E) Serum levels of GGT in the experimental mouse models.  $n = 12$  for each group; ns,  $P > 0.05$ ; \* $P < 0.05$ ; \*\* $P < 0.01$ ; \*\*\* $P < 0.001$ ; \*\*\*\* $P < 0.0001$ ; two-tailed T test.
